# Supplementary material for: Gender and autistic traits modulate implicit motor synchrony
Source: PubMed Central journal article supplement (PMC5584984; doi:10.1371/journal.pone.0184083), 2017-09-05
Supplement: pone.0184083.s001.pdf [file pone.0184083.s001.pdf]

Supporting Information I:

This is the interpersonal judgment scale (IJS) used in the study (translated to Chinese).

The original IJS questionnaire can be found:

IJS: in Vol. 11 of the book *The attraction paradigm*, written by Byrne, D.

請選擇最合適的一項來描述你的同行夥伴。

|               | 強烈同意 | 同意 | 略為同意 | 中立 | 略為不同意 | 不同意 | 強烈不同意 |
|---------------|------|----|------|----|-------|-----|-------|
| 此人的智力遠高於常人。   |      |    |      |    |       |     |       |
| 此人的道德水平極高。    |      |    |      |    |       |     |       |
| 此人對於人或環境難以適應。 |      |    |      |    |       |     |       |
| 我很喜歡此人。       |      |    |      |    |       |     |       |
| 我很討厭與此人一起工作。  |      |    |      |    |       |     |       |
