# Supplementary material for: Gender and autistic traits modulate implicit motor synchrony
Source: PLoS One. 2017 Sep 5;12(9):e0184083. doi: 10.1371/journal.pone.0184083 (PMC5584984; doi:10.1371/journal.pone.0184083)
Supplement: S2 File — (PDF) [file pone.0184083.s002.pdf]

## Supporting Information II:

This is the autism-spectrum quotient (AQ) questionnaire used in the study (translated to Chinese). The original AQ questionnaire can be found: <https://link.springer.com/article/10.1023%2FA%3A1005653411471?LI=true>

這份問卷將反映出您的溝通模式。請認真回答每一題，評估您對題中描述的同意程度，並圈出最合適的答案。

|                                   | 完全同意 | 少許同意 | 少許不同意 | 完全不同意 |
|-----------------------------------|------|------|-------|-------|
| 例子：我願意冒險。                         |      | ✓    |       |       |
| 1. 我喜歡和別人一起做事多於單獨處事。              |      |      |       |       |
| 2. 我較喜歡以相同方式重複做事。                 |      |      |       |       |
| 3. 如要想像事情，我覺得在腦海中構想該事情的畫面是容易的。    |      |      |       |       |
| 4. 我常常太沉醉於某事情而忽略了其他東西。            |      |      |       |       |
| 5. 我常常留意到一些別人不為意的細微聲音。            |      |      |       |       |
| 6. 我常常留意車牌號碼或類似的數列資料。             |      |      |       |       |
| 7. 即使我認為自己的說話很有禮貌，但別人常常告訴我那是很無禮的。 |      |      |       |       |
| 8. 在閱讀故事時，我能輕易地想像出角色的模樣。          |      |      |       |       |
| 9. 我對日期很著迷。                       |      |      |       |       |
| 10. 在社交場合中，我能輕易聽懂不同人的對話。          |      |      |       |       |
| 11. 我覺得身處社交場合是輕鬆自在的事。             |      |      |       |       |
| 12. 我傾向留意一些別人不為意的細節。              |      |      |       |       |
| 13. 我喜歡去圖書館多於宴會。                  |      |      |       |       |
| 14. 我覺得虛構故事是容易的。                  |      |      |       |       |
| 15. 相對於物件，我對人有更大興趣。               |      |      |       |       |
| 16. 我容易有強烈的喜好；如不能從事這些喜好，我會感到不開心。  |      |      |       |       |
| 17. 我喜愛與別人閒談。                     |      |      |       |       |
| 18. 我說話時別人不容易插嘴。                  |      |      |       |       |
| 19. 我對數字很著迷。                      |      |      |       |       |
| 20. 在閱讀故事時，我覺得很難明白故事人物的意圖。        |      |      |       |       |
| 21. 我並不特別喜歡閱讀小說。                  |      |      |       |       |
| 22. 我覺得很難結識新朋友。                   |      |      |       |       |
| 23. 我常常留意事物的規律模式。                 |      |      |       |       |
| 24. 我喜歡去戲院多於博物館。                  |      |      |       |       |
| 25. 當日常生活被擾亂，我不會感到煩躁。             |      |      |       |       |

接下頁...

... 接上頁

|                                     | 完全同意 | 少許同意 | 少許不同意 | 完全不同意 |
|-------------------------------------|------|------|-------|-------|
| 例子：我願意冒險。                           |      | ✓    |       |       |
| 26. 我不懂得怎樣持續一段對話。                   |      |      |       |       |
| 27. 我覺得理解對方說話的背後含意是容易的。             |      |      |       |       |
| 28. 我通常留意事情的整體多於其細節。                |      |      |       |       |
| 29. 我不善於牢記電話號碼。                     |      |      |       |       |
| 30. 我很少留意身處境地或別人外表的細微轉變。            |      |      |       |       |
| 31. 我會知道別人何時對我的說話感厭煩。               |      |      |       |       |
| 32. 我覺得同時處理不同的事情是容易的。               |      |      |       |       |
| 33. 在電話對談中，我不肯定何時應該發言。              |      |      |       |       |
| 34. 我喜愛自發地做事。                       |      |      |       |       |
| 35. 我常常是最後一個才明白笑話意思的人。              |      |      |       |       |
| 36. 我覺得從察看別人表情去了解他們的想法或感受是容易的。      |      |      |       |       |
| 37. 若正進行的活動被打斷，我可以很快恢復進行該事情。        |      |      |       |       |
| 38. 我善於與別人閒談。                       |      |      |       |       |
| 39. 別人常常告知我，我不斷重複做或說同一件事情。          |      |      |       |       |
| 40. 當我較年幼時，我喜歡和小朋友玩假裝遊戲。            |      |      |       |       |
| 41. 我喜歡收集某個種類(如車類、雀鳥類、火車類、植物類等)的資料。 |      |      |       |       |
| 42. 我很難想像自己成為別人會是怎樣的。               |      |      |       |       |
| 43. 我喜歡仔細計劃自己參與的每一項活動。              |      |      |       |       |
| 44. 我喜歡社交場合。                        |      |      |       |       |
| 45. 我覺得理解別人意圖是困難的。                  |      |      |       |       |
| 46. 新環境令我緊張。                        |      |      |       |       |
| 47. 我喜歡認識新朋友。                       |      |      |       |       |
| 48. 我是個善於交際的人。                      |      |      |       |       |
| 49. 我不善於牢記別人的出生日期。                  |      |      |       |       |
| 50. 我覺得和小朋友玩假裝遊戲是容易的。               |      |      |       |       |

感謝您的參與！
